# Supplementary material
Source: Research Square preprint supplement (doi:10.21203/rs.3.rs-9843712/v1)
Supplement: Supplementary file 1 [file 6f2cadfdfe9b296386033578.docx]

**Comparison of views on aging between family caregivers of people living with dementia and non-caregivers: Australian data spanning the full adult lifespan**

| **Supplementary Table 1.** *Correlation Matrix of Study Variables for Caregivers.* | | | | | | | | | | | | | | |
| --- | --- | --- | --- | --- | --- | --- | --- | --- | --- | --- | --- | --- | --- | --- |
|  | 1. | 2. | 3. | 4. | 5. | 6. | 7. | 8. | 9. | 10. | 11. | 12. | 13. | 14. |
| 1. Age | __ |  |  |  |  |  |  |  |  |  |  |  |  |  |
| 2. Sex | -0.02; .844 | __ |  |  |  |  |  |  |  |  |  |  |  |  |
| 3. Country of birth | **0.24; .003** | -0.02; .811 | __ |  |  |  |  |  |  |  |  |  |  |  |
| 4. Education | **0.42; .001** | -0.01; .887 | -0.001; .992 | __ |  |  |  |  |  |  |  |  |  |  |
| 5. Marital status | **-0.54; .001** | **-0.001, .003** | -0.08; .345 | **-0.30; .001** | __ |  |  |  |  |  |  |  |  |  |
| 6. Working status | -0.07; .399 | 0.03; .698 | 0.04; .639 | **-0.26; .001** | **0.22; .006** | __ |  |  |  |  |  |  |  |  |
| 7. Number of mental illnesses | **-**0.15; .053 | -0.08; .323 | -0.09; .263 | -0.02; .779 | 0.05; .577 | 0.004; .963 | __ |  |  |  |  |  |  |  |
| 8. Number of chronic conditions | **0.55; .001** | 0.04; .591 | **0.22; .007** | 0.12; .139 | **-0.27; .001** | 0.10; .231 | -0.11; .152 | __ |  |  |  |  |  |  |
| 9. Felt age | -0.13; .104 | **-0.16; .045** | 0.08; .334 | 0.02; .813 | 0.06; .467 | -0.04; .657 | -0.02; .798 | -0.03; .705 | __ |  |  |  |  |  |
| 10. AARC-Gains | 0.04; .642 | -0.09; .279 | -0.11; .155 | 0.11; .176 | -0.08; .321 | 0.02; .832 | -0.08; .344 | 0.01; .876 | 0.04; .656 | __ |  |  |  |  |
| 11. AARC-Losses | 0.07; .393 | -0.01; .917 | 0.06; .452 | -0.05; .564 | -0.04; .643 | 0.06; .439 | **0.22; .007** | 0.10; .211 | -0.11; .185 | 0.10; .203 | __ |  |  |  |
| 12. NEBA | **0.25; .002** | 0.09; .292 | 0.003; .974 | **0.18; .023** | -0.11; .159 | -0.02; .788 | **-0.19; .016** | 0.07; .389 | -0.09; .276 | **0.17; .037** | -0.10; .213 | __ |  |  |
| 13. ERA mental health | 0.14; .073 | -0.02; .835 | -0.11; .175 | 0.02; .801 | **-0.18; .027** | 0.09; .248 | -0.13; .095 | 0.04; .652 | 0.12; .148 | **0.40; .001** | -0.03; .710 | 0.16; .053 | __ |  |
| 14. ERA physical health | 0.05; .516 | 0.01; .914 | 0.10; .223 | 0.08; .305 | -0.01; .953 | 0.01; .894 | -0.15; .058 | -0.08; .332 | 0.10; .199 | **0.32; .001** | -0.04; .660 | **0.23; .005** | **0.55; .001** | __ |
| 15. ERA cognitive function | 0.002; .984 | 0.02; .797 | 0.05; .545 | 0.05, .557 | -0.05; .578 | 0.09; .252 | -0.08; .341 | 0.05; .540 | 0.11; .159 | **0.24; .003** | -0.06; .462 | 0.05; .499 | **0.60; .001** | **0.62; .001** |
| *Notes.* Reported values are Pearson’s correlation coefficients and p-values. Significant correlations are reported in bold. | | | | | | | | | | | | | | |

| **Supplementary Table 2.** *Correlation Matrix of Study Variables for Non-Caregivers.* | | | | | | | | | | | | | | |
| --- | --- | --- | --- | --- | --- | --- | --- | --- | --- | --- | --- | --- | --- | --- |
|  | 1. | 2. | 3. | 4. | 5. | 6. | 7. | 8. | 9. | 10. | 11. | 12. | 13. | 1.4 |
| 1. Age | __ |  |  |  |  |  |  |  |  |  |  |  |  |  |
| 2. Sex | **0.16; .013** | __ |  |  |  |  |  |  |  |  |  |  |  |  |
| 3. Country of birth | **0.16; .019** | 0.02; .771 | __ |  |  |  |  |  |  |  |  |  |  |  |
| 4. Education | **0.54; .001** | 0.01; .906 | 0.03; .608 | __ |  |  |  |  |  |  |  |  |  |  |
| 5. Marital status | **-0.47; .001** | 0.01; .876 | -0.001; .994 | **-0.28; .001** | __ |  |  |  |  |  |  |  |  |  |
| 6. Working status | 0.04; .564 | 0.06; .399 | 0.10; .152 | -0.13; .056 | 0.05; .466 | _ |  |  |  |  |  |  |  |  |
| 7. Number of mental illnesses | **-0.26; .001** | **-0.16; .019** | **-0.14; .031** | **-0.21; .002** | **0.21; .002** | -0.08; .234 | __ |  |  |  |  |  |  |  |
| 8. Number of chronic conditions | **0.54; .001** | 0.10; .123 | **0.14; .039** | **0.17; .009** | **-0.19; .004** | 0.07; .317 | 0.03; 615 | __ |  |  |  |  |  |  |
| 9. Felt age | **0.37; .001** | -0.03; .622 | -0.07; .275 | **0.26; .001** | **-0.26; .001** | 0.07; .273 | -0.08; .212 | 0.12; .082 | __ |  |  |  |  |  |
| 10. AARC-Gains | **0.13; .047** | -0.09; .196 | 0.09; .137 | -0.03; .644 | **-0.22; .001** | 0.06; .384 | -0.03; .641 | 0.04; .535 | 0.12; .069 | __ |  |  |  |  |
| 11. AARC-Losses | **0.23; .001** | 0.06; .334 | 0.05; .431 | 0.001; .994 | 0.03; .653 | -0.07; .292 | 0.05; .442 | **0.32; .001** | -0.07; .308 | 0.03; .698 | __ |  |  |  |
| 12. NEBA | **0.16; .016** | 0.02; .777 | 0.04; .578 | **0.14; .034** | **-0.16; .017** | 0.02; .784 | **-0.16; .014** | 0.04; .558 | 0.07; .307 | 0.11; .087 | -0.08; .249 | __ |  |  |
| 13. ERA mental health | 0.04; .514 | -0.07, .308 | -0.02; .735 | -0.02; .774 | **-0.16; .018** | 0.09; .139 | -0.09; .192 | -0.01; .894 | 0.08; .240 | 0.03; .663 | **-0.22; .001** | 0.10; 0.127 | __ |  |
| 14. ERA physical health | -0.07; .269 | -0.10; .130 | 0.12; .062 | -0.07; .269 | -0.07; .311 | -0.002; .980 | -0.06; .346 | -0.12; .059 | 0.03; .625 | 0.03; .648 | **-0.32; .001** | **0.20; .002** | **0.55; .001** | __ |
| 15. ERA cognitive function | -0.05; .447 | -0.10; .151 | 0.12; .075 | -0.03; .659 | **-0.001; .003** | 0.05; .437 | -0.05; .497 | -0.12; .089 | 0.03; .608 | 0.13; .056 | **-0.30; .001** | 0.10; .117 | **0.54; .001** | **0.61; .001** |
| *Notes.* Reported values are Pearson’s correlation coefficients and p-values. Significant correlations are reported in bold. | | | | | | | | | | | | | | |

| **Supplementary Table 3.** *Caregiving Status as Independent Variable and Felt Age as Dependent Variable – Multivariable Model.* | | | | | |
| --- | --- | --- | --- | --- | --- |
| Predictors | B (95% CI) | SE | *p* | β | R2 |
| Caregiving status | -0.75 (-2.05; 0.55) | 0.66 | .258 | -0.06 | 0.01 |
| Age | -0.03 (-0.09; 0.03) | 0.03 | .364 | -0.10 | 0.01 |
| Sex | -1.53 (-3.16; 0.09) | 0.83 | .065 | -0.10 | 0.01 |
| Country of birth |  |  |  |  |  |
| Oceania and Antarctica | Reference category |  |  |  |  |
| Other countries | 0.92 (-0.40; 2.23) | 0.67 | .171 | 0.08 | 0.004 |
| Education |  |  |  |  |  |
| Secondary education and below | Reference category |  |  |  |  |
| Certificate III & IV Level or Advanced Diploma & Diploma Level |  |  |  |  |  |
| Bachelor Degree Level, Graduate Diploma & Graduate Certificate, or Postgraduate degree and doctorate |  |  |  |  |  |
| Marital status |  |  |  |  |  |
| Married, de facto, civil partnership, or co-habiting | Reference category |  |  |  |  |
| Single |  |  |  |  |  |
| Other (including widowed, divorced, and separated) |  |  |  |  |  |
| Working status |  |  |  |  |  |
| Employed full-time, employed part-time, or self-employed |  |  |  |  |  |
| Retired or unemployed | Reference category |  |  |  |  |
| Student |  |  |  |  |  |
| Number of mental health diagnoses | -0.18 (-0.64; 0.29) | 0.24 | .448 | -0.04 | 0.002 |
| Number of physical health diagnoses | 0.41 (-0.25; 1.08) | 0.34 | .221 | 0.08 | 0.002 |
| *Notes.* B= Unstandardized coefficient.SE= Standard error*. p= p-value.* β= Standardized coefficient. R2= Coefficient of determination. | | | | | |

| **Supplementary Table 4.** *Caregiving Status as Independent Variable and Perceived Age-Related Gains as Dependent Variable – Multivariable Model.* | | | | | |
| --- | --- | --- | --- | --- | --- |
| Predictors | B (95% CI) | SE | *p* | β | R2 |
| Caregiving status | -0.46 (-1.31; 0.38) | 0.43 | .282 | -0.06 | 0.003 |
| Age | -0.01 (-0.05; 0.03) | 0.02 | .713 | -0.04 | 0.001 |
| Sex | -0.90 (-1.96; 0.16) | 0.54 | .095 | -0.09 | 0.01 |
| Country of birth |  |  |  |  |  |
| Oceania and Antarctica | Reference category |  |  |  |  |
| Other countries | -0.04 (-0.89; 0.81) | 0.43 | .925 | -0.01 | 0.0001 |
| Education |  |  |  |  |  |
| Secondary education and below | Reference category |  |  |  |  |
| Certificate III & IV Level or Advanced Diploma & Diploma Level |  |  |  |  |  |
| Bachelor Degree Level, Graduate Diploma & Graduate Certificate, or Postgraduate degree and doctorate |  |  |  |  |  |
| Marital status |  |  |  |  |  |
| Married, de facto, civil partnership, or co-habiting | Reference category |  |  |  |  |
| Single |  |  |  |  |  |
| Other (including widowed, divorced, and separated) |  |  |  |  |  |
| Working status |  |  |  |  |  |
| Employed full-time, employed part-time, or self-employed |  |  |  |  |  |
| Retired or unemployed | Reference category |  |  |  |  |
| Student |  |  |  |  |  |
| Number of mental health diagnoses | -0.12 (-0.42; 0.19) | 0.16 | .450 | -0.04 | 0.002 |
| Number of physical health diagnoses | -0.19 (-0.63; 0.24) | 0.22 | .381 | -0.06 | 0.001 |
| *Notes.* B= Unstandardized coefficient.SE= Standard error*. p= p-value.* β= Standardized coefficient. R2= Coefficient of determination. | | | | | |

| **Supplementary Table 5.** *Caregiving Status as Independent Variable and Perceived Age-Related Losses as Dependent Variable – Multivariable Model.* | | | | | |
| --- | --- | --- | --- | --- | --- |
| Predictors | B (95% CI) | SE | *p* | β | R2 |
| Caregiving status | **1.06 (0.29; 1.82)** | **0.39** | **.007** | **0.14** | **0.02** |
| Age | 0.002 (-0.03; 0.04) | 0.02 | .934 | 0.01 | 0.02 |
| Sex | 0.22 (-0.74; 1.17) | 0.49 | .657 | 0.02 | 0.001 |
| Country of birth |  |  |  |  |  |
| Oceania and Antarctica | Reference category |  |  |  |  |
| Other countries | 0.002 (-0.77; 0.77) | 0.39 | .996 | 0.0002 | 0.00 |
| Education |  |  |  |  |  |
| Secondary education and below | Reference category |  |  |  |  |
| Certificate III & IV Level or Advanced Diploma & Diploma Level |  |  |  |  |  |
| Bachelor Degree Level, Graduate Diploma & Graduate Certificate, or Postgraduate degree and doctorate |  |  |  |  |  |
| Marital status |  |  |  |  |  |
| Married, de facto, civil partnership, or co-habiting | Reference category |  |  |  |  |
| Single |  |  |  |  |  |
| Other (including widowed, divorced, and separated) |  |  |  |  |  |
| Working status |  |  |  |  |  |
| Employed full-time, employed part-time, or self-employed |  |  |  |  |  |
| Retired or unemployed | Reference category |  |  |  |  |
| Student |  |  |  |  |  |
| Number of mental health diagnoses | **0.29 (0.02; 0.57)** | **0.14** | **.037** | **0.11** | **0.02** |
| Number of physical health diagnoses | **0.53 (0.13; 0.92)** | **0.20** | **.009** | **0.16** | **0.02** |
| *Notes.* B= Unstandardized coefficient.SE= Standard error*. p= p-value.* β= Standardized coefficient. R2= Coefficient of determination. | | | | | |

| **Supplementary Table 6.** *Caregiving Status as Independent Variable and Essentialist Beliefs About Aging as Dependent Variable – Multivariable Model.* | | | | | |
| --- | --- | --- | --- | --- | --- |
| Predictors | B (95% CI) | SE | *p* | β | R2 |
| Caregiving status | **-4.55 (-8.55; -0.55)** | **2.03** | **.026** | **-0.12** | **0.02** |
| Age | 0.09 (-0.10; 0.28) | 0.10 | .343 | 0.10 | 0.01 |
| Sex | -0.06 (-5.01; 4.89) | 2.52 | .980 | -0.001 | 0.00 |
| Country of birth |  |  |  |  |  |
| Oceania and Antarctica | Reference category |  |  |  |  |
| Other countries | -1.64 (-5.65; 2.37) | 2.04 | .422 | -0.04 | 0.002 |
| Education |  |  |  |  |  |
| Secondary education and below | Reference category |  |  |  |  |
| Certificate III & IV Level or Advanced Diploma & Diploma Level |  |  |  |  |  |
| Bachelor Degree Level, Graduate Diploma & Graduate Certificate, or Postgraduate degree and doctorate |  |  |  |  |  |
| Marital status |  |  |  |  |  |
| Married, de facto, civil partnership, or co-habiting | Reference category |  |  |  | 0.001 |
| Single |  |  |  |  |  |
| Other (including widowed, divorced, and separated) |  |  |  |  |  |
| Working status |  |  |  |  |  |
| Employed full-time, employed part-time, or self-employed |  |  |  |  |  |
| Retired or unemployed | Reference category |  |  |  |  |
| Student |  |  |  |  |  |
| Number of mental health diagnoses | **-1.50 (-2.93; -0.07)** | **0.73** | **.040** | **-0.11** | **0.01** |
| Number of physical health diagnoses | -0.99 (-3.03; 1.04) | 1.03 | .337 | -0.06 | 0.001 |
| *Notes.* B= Unstandardized coefficient.SE= Standard error*. p= p-value.* β= Standardized coefficient. R2= Coefficient of determination. | | | | | |

| **Supplementary Table 7.** *Caregiving Status as Independent Variable and Expectations Regarding Aging Mental Health as Dependent Variable – Multivariable Model.* | | | | | |
| --- | --- | --- | --- | --- | --- |
| Predictors | B (95% CI) | SE | *p* | β | R2 |
| Caregiving status | **-1.68 (-2.58; -0.77)** | **0.46** | **.001** | **-0.19** | **0.04** |
| Age | 0.001 (-0.04; 0.04) | 0.02 | .970 | 0.004 | 0.003 |
| Sex | -0.96 (-2.09; 0.18) | 0.58 | .097 | -0.09 | 0.01 |
| Country of birth |  |  |  |  |  |
| Oceania and Antarctica | Reference category |  |  |  |  |
| Other countries | -0.74 (-1.66; 0.17) | 0.46 | .110 | -0.09 | 0.01 |
| Education |  |  |  |  |  |
| Secondary education and below | Reference category |  |  |  |  |
| Certificate III & IV Level or Advanced Diploma & Diploma Level |  |  |  |  |  |
| Bachelor Degree Level, Graduate Diploma & Graduate Certificate, or Postgraduate degree and doctorate |  |  |  |  |  |
| Marital status |  |  |  |  |  |
| Married, de facto, civil partnership, or co-habiting | Reference category |  |  |  |  |
| Single |  |  |  |  |  |
| Other (including widowed, divorced, and separated) |  |  |  |  |  |
| Working status |  |  |  |  |  |
| Employed full-time, employed part-time, or self-employed |  |  |  |  |  |
| Retired or unemployed | Reference category |  |  |  |  |
| Student |  |  |  |  |  |
| Number of mental health diagnoses | -0.23 (-0.56; 0.10) | 0.17 | .166 | -0.07 | 0.01 |
| Number of physical health diagnoses | -0.15 (-0.62; 0.31) | 0.24 | .512 | -0.04 | 0.001 |
| *Notes.* B= Unstandardized coefficient.SE= Standard error*. p= p-value.* β= Standardized coefficient. R2= Coefficient of determination. | | | | | |

| **Supplementary Table 8.** *Caregiving Status as Independent Variable and Expectations Regarding Aging Physical Health as Dependent Variable – Multivariable Model.* | | | | | |
| --- | --- | --- | --- | --- | --- |
| Predictors | B (95% CI) | SE | p-value | β | R2 |
| Caregiving status | -0.35 (-1.17; 0.47) | 0.42 | .399 | -0.05 | 0.003 |
| Age | -0.001 (-0.04; 0.04) | 0.02 | .965 | -0.01 | 0.00 |
| Sex | -0.61 (-1.63; 0.42) | 0.52 | .245 | -0.06 | 0.006 |
| Country of birth |  |  |  |  |  |
| Oceania and Antarctica | Reference category |  |  |  |  |
| Other countries | 0.81 (-0.02; 1.64) | 0.42 | .055 | 0.11 | 0.01 |
| Education |  |  |  |  |  |
| Secondary education and below | Reference category |  |  |  |  |
| Certificate III & IV Level or Advanced Diploma & Diploma Level |  |  |  |  |  |
| Bachelor Degree Level, Graduate Diploma & Graduate Certificate, or Postgraduate degree and doctorate |  |  |  |  |  |
| Marital status |  |  |  |  |  |
| Married, de facto, civil partnership, or co-habiting | Reference category |  |  |  |  |
| Single |  |  |  |  |  |
| Other (including widowed, divorced, and separated) |  |  |  |  |  |
| Working status |  |  |  |  |  |
| Employed full-time, employed part-time, or self-employed |  |  |  |  |  |
| Retired or unemployed | Reference category |  |  |  |  |
| Student |  |  |  |  |  |
| Number of mental health diagnoses | -0.21 (-0.51; 0.08) | 0.15 | .154 | -0.08 | 0.007 |
| Number of physical health diagnoses | **-0.50 (-0.92; -0.08)** | **0.21** | **.019** | **-0.15** | **0.02** |
| *Notes.* B= Unstandardized coefficient.SE= Standard error*. p= p-value.* β= Standardized coefficient. R2= Coefficient of determination. | | | | | |

| **Supplementary Table 9.** *Caregiving Status as Independent Variable and Expectations Regarding Aging Cognitive Function as Dependent Variable – Multivariable Model.* | | | | | |
| --- | --- | --- | --- | --- | --- |
| Predictors | B (95% CI) | SE | *p* | β | R2 |
| Caregiving status | -0.78 (-1.70; 0.15) | 0.47 | .101 | -0.09 | 0.01 |
| Age | 0.003 (-0.04; 0.05) | 0.02 | .878 | 0.02 | 0.001 |
| Sex | -0.78 (-1.94; 0.38) | 0.59 | .188 | -0.07 | 0.01 |
| Country of birth |  |  |  |  |  |
| Oceania and Antarctica | Reference category |  |  |  |  |
| Other countries | 0.94 (0.002; 1.87) | 0.48 | .050 | 0.11 | 0.01 |
| Education |  |  |  |  |  |
| Secondary education and below | Reference category |  |  |  |  |
| Certificate III & IV Level or Advanced Diploma & Diploma Level |  |  |  |  |  |
| Bachelor Degree Level, Graduate Diploma & Graduate Certificate, or Postgraduate degree and doctorate |  |  |  |  |  |
| Marital status |  |  |  |  |  |
| Married, de facto, civil partnership, or co-habiting | Reference category |  |  |  |  |
| Single |  |  |  |  |  |
| Other (including widowed, divorced, and separated) |  |  |  |  |  |
| Working status |  |  |  |  |  |
| Employed full-time, employed part-time, or self-employed |  |  |  |  |  |
| Retired or unemployed | Reference category |  |  |  |  |
| Student |  |  |  |  |  |
| Number of mental health diagnoses | -0.11 (-0.45; 0.22) | 0.17 | .513 | -0.04 | 0.002 |
| Number of physical health diagnoses | -0.21 (-0.68; 0.27) | 0.24 | .392 | -0.06 | 0.003 |
| *Notes.* B= Unstandardized coefficient.SE= Standard error*. p= p-value.* β= Standardized coefficient. R2= Coefficient of determination. | | | | | |

**Supplementary Text 1. Online survey administered to family dementia caregivers**

Carers survey – Official

Start of Block: Introduction

Welcome, and thank you for being here. We know your time is valuable, and we really appreciate you choosing to share your experiences with us. This survey is part of a national project aimed at better understanding the lives of people who support, help out, or care for a loved one living with dementia. Caring can look different for everyone. For this study, we consider you a “carer” if you do any of the following for someone living with dementia: - Help with things like cooking, cleaning, or managing money - Support their healthcare (e.g., appointments, medications) - Assist with personal care (e.g., dressing, bathing) or mobility - Offer emotional support or help them stay socially connected Even if you don’t see yourself as a ‘carer’ in the traditional sense, your experiences still matter, and we want to hear from you. We also understand that supporting someone with dementia can be both meaningful and difficult. Some of the questions in this survey may bring up sensitive or emotional topics. You’re in control: if anything feels too much, you can skip a question, pause, or come back later when you feel ready. The data that we collect will be separated from your name and contact details. We’ll only share group-level (aggregated) results in publications or reports. Thanks again for taking part. Your voice is important, and by sharing it, you're helping improve support for people just like you.

End of Block: Introduction

Start of Block: Participant information and consent

Please carefully read through the participant information sheet and then indicate below whether you consent to participate in this study.

Q130 • I have read the information statement version listed above and I understand its contents. • I believe I understand the purpose, extent and possible risks of my involvement in this project. • I voluntarily consent to take part in this research project. • I understand I do not have to answer questions and can withdraw at any time. • I have had an opportunity to ask questions (Amber.izett@student.curtin.edu.au; Claire.burley@curtin.edu.au), and I am satisfied with the answers I have received. • I understand that this project has been approved by Curtin University Human Research Ethics Committee (HRE2025-0207) and will be carried out in line with the National Statement on Ethical Conduct in Human Research (2007). • I understand I can download a copy of this Participant Information Sheet and keep for my records. Please sign below to indicate you agree to the above outlined points:

End of Block: Participant information and consent

Start of Block: Socio-demographic questions

Q1a Your first and last name: Please note, you will be allocated an ID number and your responses will not be linked to your name.

________________________________________________________________

| 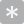 |
| --- |

Q2 Your age in years:

________________________________________________________________

Q3a Which of the following best describes your current gender identity?

- Woman or female (1)
- Man or male (2)
- Non-binary (3)
- I use a different term (please specify) (4) __________________________________________________
- Prefer not to say (5)

Q3b At birth, you were recorded as: (optional)

- Female (1)
- Male (2)
- Another term (please specify) (3) __________________________________________________
- Prefer not to say (4)

Q4 Do you identify as Aboriginal and/or Torres Strait Islander?

- Yes (1)
- No (2)
- Prefer not to say (3)

Q5a Which country/region were you born in?

- Oceania and Antarctica (1)
- North-West Europe (2)
- Southern and Eastern Europe (3)
- North Africa and the Middle East (4)
- South-East Asia (5)
- North-East Asia (6)
- Southern and Central Asia (7)
- Americas (8)
- Sub-Saharan Africa (9)
- Not sure/do not know (10)
- Another region/country not listed, please specify: (11) __________________________________________________
- Prefer not to say (12)

Q5b What is your cultural background? (Tick all that apply)

- Oceanian (1)
- North-West European (2)
- Southern and Eastern European (3)
- North African and Middle Eastern (4)
- South-East Asian (5)
- North-East Asian (6)
- Southern and Central Asian (7)
- People of the Americas (8)
- Sub-Saharan African (9)
- Not sure/do not know (10)
- Another cultural background not listed, please specify: (11) __________________________________________________
- Prefer not to say (12)

Q5c Do you use a language other than English?

- Yes. Please state other language/s: (1) __________________________________________________
- No (2)

Q6 What is the highest level of education you have completed?

- No education (1)
- Primary education (2)
- Secondary education (Years 9 and below) (3)
- Certificate I & II Level (4)
- Secondary education (Years 10 and above) (5)
- Certificate III & IV Level (6)
- Advanced Diploma & Diploma Level (7)
- Bachelor Degree Level (8)
- Graduate Diploma & Graduate Certificate Level (9)
- Postgraduate Degree Level (MA, MSc etc.) (10)
- Postgraduate Doctorate Level (PhD, MD) (11)
- Other (e.g., overseas qualification/s), please specify: (12) __________________________________________________

Q7 What is your marital status?

- Married (1)
- De Facto (2)
- Widowed (3)
- Divorced (4)
- Separated (5)
- Civil partnership (6)
- Co-habiting (7)
- Single (8)
- Other, please specify: (9) __________________________________________________
- Prefer not to say (10)

Q8 What is your current employment status?

- Employed (full-time) (1)
- Employed (part-time) (2)
- Self-employed (3)
- Retired (4)
- Student (7)
- Unemployed (5)
- Prefer not to say (6)

Q9/4.3 Have you made any of these changes due to caregiving? (Select all that apply)

- Reduce working hours (1)
- Change jobs (2)
- Leave employment (3)
- Postpone or abandon education/training (4)
- Move house (5)
- Postpone personal life goals (6)
- Reduce social activities (7)
- End or pause romantic relationships (8)
- Delay starting a family (9)
- Reduce time spent on hobbies (10)
- Other (please specify) (11) __________________________________________________
- None of the above (12)

Q10 Do you have a diagnosis of any of the following physical health conditions? (Select all that apply)

- High blood pressure (1)
- Stroke (2)
- Heart disease (3)
- Heart attack (24)
- Angina (25)
- Atrial fibrillation (26)
- Type 1 diabetes (4)
- Type 2 diabetes (27)
- Mild Cognitive Impairment (MCI) (5)
- Parkinson's Disease (6)
- High cholesterol (7)
- Hypothyroidism (8)
- Hyperthyroidism (9)
- Arthritis (10)
- Huntington's Disease (11)
- Cancer (current) (12)
- Cancer (in full remission - no evidence of disease) (13)
- Osteoporosis (14)
- Asthma (15)
- Epilepsy (16)
- Motor Neurone Disease (17)
- Multiple Sclerosis (18)
- Paget's Disease (19)
- Deep Vein Thrombosis (20)
- Human Immunodeficiency Virus (HIV) (21)
- Acquired Immunodeficiency Virus (AIDS) (22)
- Hepatitis C Virus (chronic phase infection) (23)
- None of the above (28)
- Do not know (29)
- Prefer not to say (30)

| Page Break |  |
| --- | --- |

Q11 In the past 7 days, how would you rate your pain experienced on average?

|  | 0 (1) | 1 (2) | 2 (3) | 3 (4) | 4 (5) | 5 (6) | 6 (7) | 7 (8) | 8 (9) | 9 (10) | 10 (11) |
| --- | --- | --- | --- | --- | --- | --- | --- | --- | --- | --- | --- |
| 0 = No pain; 10 = Worst pain imaginable (1) |  |  |  |  |  |  |  |  |  |  |  |

Q12 Do you have a diagnosis of any of the following mental health conditions? Please select those that apply:

- Depression (1)
- Mania, Hypomania, Bipolar, or Manic-depression (2)
- Anxiety, nerves, or generalised anxiety disorder (3)
- Social anxiety or social phobia (4)
- Agoraphobia (5)
- Panic attacks (6)
- Obsessive Compulsive Disorder (OCD) (7)
- Anorexia Nervosa (8)
- Bulimia Nervosa (9)
- Psychological over-eating or binge-eating (10)
- Schizophrenia (11)
- Any other type of psychosis or psychotic illness (12)
- A personality disorder (13)
- Autism, Aspergers or autistic spectrum disorder (14)
- Attention Deficit Disorder (ADD) or Attention Deficit and Hyperactivity Disorder (ADHD) (15)
- None of the above (16)
- Do not know (17)
- Prefer not to say (18)

Q82 Please indicate the extent to which you believe the following statements are true to you.

|  | Not at all (1) | Several days (2) | More than half the days (3) | Nearly every day (4) |
| --- | --- | --- | --- | --- |
| Over the last 2 weeks, how often have you been bothered by feeling nervous, anxious or on edge? (1) |  |  |  |  |
| Over the last 2 weeks, how often have you been bothered by not being able to stop or control worrying? (2) |  |  |  |  |
| Over the last 2 weeks, how often have you been bothered by little interest or pleasure in doing things? (3) |  |  |  |  |
| Over the last 2 weeks, how often have you felt down, depressed, or hopeless? (4) |  |  |  |  |

Q14.1 In the last month, how many times have you done any physical activity lasting at least 20 minutes that has left you out of breath?

- 0 times (1)
- 1 - 3 times (2)
- 4 - 10 times (3)
- 11 - 20 times (4)
- More than 20 times (5)

Q14.2 How much do you move and exert yourself physically during your leisure time (in the past year)? If your activity varies greatly between, for example, summer and winter, try to estimate on average.

- Physically inactive: Almost completely inactive, reading, watching television, watching movies, using computers or doing other sedentary activities, during leisure time. (1)
- Some light physical activity: Physically active for at least 4 hours/week, such as riding a bicycle or walking to work, walking with the family, gardening, fishing, table tennis, bowling etc. (2)
- Regular physical activity and training: Spending time doing heavy gardening, running, swimming, playing tennis, badminton, calisthenics and similar activities, for at least 2-3 hours/week. (3)
- Regular hard physical training for competitive sports: Spending time running, orienteering, skiing, swimming, playing football, handball etc. several times per week. (4)

End of Block: Socio-demographic questions

Start of Block: Views on ageing questions

This section contains statements on how a person may feel about getting older. Please indicate the extent to which you agree or disagree with the following statements.

Q15 With my increasing age, I realise that I pay more attention to my health.

- Not at all (1)
- A little (2)
- Moderately (3)
- Quite a bit (4)
- Very much (5)

Q16 With my increasing age, I realise that I have more experience and knowledge to evaluate things and people.

- Not at all (1)
- A little (2)
- Moderately (3)
- Quite a bit (4)
- Very much (5)

Q17 With my increasing age, I realise that I appreciate relationships and people much more.

- Not at all (1)
- A little (2)
- Moderately (3)
- Quite a bit (4)
- Very much (5)

Q18 With my increasing age, I realise that I have a better sense of what is important for me.

- Not at all (1)
- A little (2)
- Moderately (3)
- Quite a bit (4)
- Very much (5)

Q19 With my increasing age, I realise that I have more freedom to live my days the way I want.

- Not at all (1)
- A little (2)
- Moderately (3)
- Quite a bit (4)
- Very much (5)

Q20 With my increasing age, I realise that I have less energy.

- Not at all (1)
- A little (2)
- Moderately (3)
- Quite a bit (4)
- Very much (5)

Q21 With my increasing age, I realise that my mental capacity is declining.

- Not at all (1)
- A little (2)
- Moderately (3)
- Quite a bit (4)
- Very much (5)

Q22 With my increasing age, I realise that I feel more dependent on the help of others.

- Not at all (1)
- A little (2)
- Moderately (3)
- Quite a bit (4)
- Very much (5)

Q23 With my increasing age, I realise that I find it harder to motivate myself.

- Not at all (1)
- A little (2)
- Moderately (3)
- Quite a bit (4)
- Very much (5)

Q24 With my increasing age, I realise that I have to limit my activities.

- Not at all (1)
- A little (2)
- Moderately (3)
- Quite a bit (4)
- Very much (5)

| 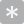 |
| --- |

Q25 Many people feel younger or older than they actually are. Fill in the age (in years) that you feel most of the time.

________________________________________________________________

| 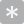 |
| --- |

Q26 If you could be any age that you wanted to be, what age would you choose (in years)?

________________________________________________________________

| 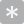 |
| --- |

Q27 What age do you think you will live to?

________________________________________________________________

Q28 What do you think: Is the way we are aging immutable and predetermined by genetics or more malleable and changeable?

|  | 0 | 10 | 20 | 30 | 40 | 50 | 60 | 70 | 80 | 90 | 100 |
| --- | --- | --- | --- | --- | --- | --- | --- | --- | --- | --- | --- |

| 0 = Immutable and predetermined by genetics; 100 = Malleable and changeable () | 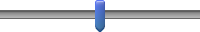 |
| --- | --- |

| 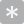 |
| --- |

Q29 At what age would you describe someone as being "old" (in years)?

________________________________________________________________

End of Block: Views on ageing questions

Start of Block: Expectations of ageing

Q30 The following questions regard your expectations about ageing. Please indicate the extent to which you agree or disagree with the following statements.

|  | Definitely agree (1) | Somewhat agree (2) | Somewhat disagree (4) | Definitely disagree (5) |
| --- | --- | --- | --- | --- |
| When people get older, they need to lower their expectations of how healthy they can be. (6) |  |  |  |  |
| Having more aches and pains is an accepted part of ageing. (4) |  |  |  |  |
| The human body is like a car: When it gets old, it gets worn out. (5) |  |  |  |  |
| Every year that people age, their energy levels go down a little more. (7) |  |  |  |  |
| I expect that as I get older I will spend less time with friends and family. (8) |  |  |  |  |
| Being lonely is just something that happens when people get old. (9) |  |  |  |  |
| As people get older they worry more. (10) |  |  |  |  |
| It’s normal to be depressed when you are old. (11) |  |  |  |  |
| I expect that as I get older I will become more forgetful. (12) |  |  |  |  |
| It’s an accepted part of ageing to have trouble remembering names. (13) |  |  |  |  |
| Forgetfulness is a natural occurrence just from growing old. (14) |  |  |  |  |
| It is impossible to avoid the mental slowness that happens with ageing. (15) |  |  |  |  |

End of Block: Expectations of ageing

Start of Block: Preparation for future care needs

Q42 The following statements explore your preparation for future care needs. Please indicate the extent to which you believe the following statements are true to you.

|  | Not at all true of me (1) | Not really true of me (2) | Neither true nor untrue (3) | Somewhat true of me (4) | Completely true of me (5) |
| --- | --- | --- | --- | --- | --- |
| I have thought about whether I might need help or care in the future. (1) |  |  |  |  |  |
| I try not to think about things like future loss of independence. (2) |  |  |  |  |  |
| I have gathered information about options for care by talking to friends and/or relatives. (3) |  |  |  |  |  |
| If I ever need help or care, I can choose between several options that I have considered in some depth. (4) |  |  |  |  |  |
| I have explained to someone close to me what my care preferences are (e.g., involvement in decision-making processes, receiving information regarding your illness, views on end of life care). (5) |  |  |  |  |  |

Q89 Advanced care planning involves planning for your and/or your loved ones' future health care. It enables you and your loved ones to make decisions about the health care you would or would not like to receive if you were to become seriously ill and unable to communicate your preferences or make treatment decisions. Have you discussed advanced care planning with your GP or another healthcare professional?

- Yes (1)
- No (2)
- Unsure (3)
- Prefer not to say (4)

End of Block: Preparation for future care needs

Start of Block: Questions about the person they provide care for

Now we're going to think about the person your provide care for.

| 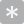 |
| --- |

Q47 How old is the person living with dementia you provide care for (in years)?

________________________________________________________________

Q48 What is the sex of the person living with dementia you care for?

- Male (1)
- Female (2)
- Non-binary / third gender (3)
- Prefer not to say (4)
- Other (please specify): (5) __________________________________________________

Q49 Please indicate the specific dementia diagnosis of the person you care for:

- Alzheimer's disease (1)
- Vascular dementia (2)
- Mixed Alzheimer's and Vascular dementia (3)
- Frontotemporal dementia (4)
- Parkinson's disease dementia (5)
- Lewy Body dementia (6)
- Unspecified dementia (7)
- Never received a formal diagnosis from a health care provider (8)
- Don't know/not sure (10)
- Other, please specify: (9) __________________________________________________

Q50 Please indicate the date or year in which the person living with dementia received the diagnosis (if known):

________________________________________________________________

Q51 Please indicate the date/year in which the person living with dementia started experiencing memory/cognitive changes (if known):

________________________________________________________________

Q52 The person living with dementia that I care for:

- Lives alone (1)
- Lives with me (2)
- Lives with someone else (3)
- Lives in a care/nursing home (please specify the type) (4) __________________________________________________

End of Block: Questions about the person they provide care for

Start of Block: Activities of daily living

For each of the below activities, please indicate whether the person living with dementia that you care for is able to do them independently or is dependent on others.

Q53 Bathing

- Independent (bathes self completely or needs help in bathing only a single part of the body such as the back, genital area or disabled extremity). (1)
- Dependent (needs help with bathing more than one part of the body, getting in or out of the tub or shower. Requires total bathing). (2)

Q54 Dressing

- Independent (gets clothes from closets and drawers and puts on clothes and outer garments complete with fasteners. May have help tying shoes). (1)
- Dependent (needs help with dressing self or needs to be completely dressed). (2)

Q55 Toileting

- Independent (goes to the toilet, gets on and off, arranges clothes, cleans genital area without help). (1)
- Dependent (needs help transferring to the toilet, cleaning self or uses bedpan or commode). (2)

Q56 Transferring

- Independent (moves in and out of bed or chair unassisted. Mechanical transfer aids are acceptable). (1)
- Dependent (Needs help in moving from bed to chair or requires a complete transfer). (2)

Q57 Continence

- Independent (exercises complete self control over urination and defecation). (1)
- Dependent (is partially or totally incontinent of bowel or bladder). (2)

Q58 Feeding

- Independent (Gets food from plate into mouth without help. Preparation of food may be done by another person). (1)
- Dependent (Needs partial or total help with feeding or requires parenteral feeding). (2)

Q85 Finances

- Independent (Manages personal budget, pays bills on time, makes financial decisions independently, understands bank statements and transactions). (1)
- Dependent (Requires assistance with budgeting, bill paying managed by others, needs help understanding financial documents or making financial decisions). (2)

Q86 Medications

- Independent (Takes prescribed medications correctly and on schedule without reminders, manages prescription refills, understands medication purposes and side effects). (1)
- Dependent (Requires reminders or supervision to take medications, needs help organising pills or managing prescriptions, cannot self-administer medications safely). (2)

Q90 Legal and administrative tasks

- Independent (Completes forms and paperwork independently, understands legal documents, manages appointments with professionals (lawyers, accountants), handles insurance matters). (1)
- Dependent (Requires assistance completing forms, needs help understanding legal or administrative documents, requires support managing professional appointments or correspondence). (2)

Q94 Social engagement

- Independent (Initiates and maintains social relationships, participates in community activities independently, uses communication devices (phone, email) without assistance). (1)
- Dependent (Requires encouragement or assistance to engage socially, needs support participating in activities, requires help using communication devices or maintaining relationships). (2)

Q92 Transport

- Independent (Drives safely or uses public transport independently, plans routes and manages travel arrangements, maintains a valid driver's license if applicable). (1)
- Dependent (Requires transportation assistance, cannot use public transport safely alone, needs help planning travel or no longer drives due to safety concerns). (2)

Q95 Housekeeping

- Independent (Maintains clean and organised living space, performs routine cleaning tasks, manages laundry and household maintenance independently.) (1)
- Dependent (Requires assistance with cleaning tasks, living space shows signs of neglect without help, needs support with laundry or basic household maintenance.) (2)

End of Block: Activities of daily living

Start of Block: Understanding of dementia

Q59 Please define in your own words, your understanding of dementia:

________________________________________________________________

________________________________________________________________

________________________________________________________________

________________________________________________________________

________________________________________________________________

Q60 Please indicate the extent to which you agree or disagree with the following statements:

|  | Strongly disagree (1) | Disagree (2) | Somewhat disagree (3) | Somewhat agree (4) | Agree (5) | Strongly agree (6) |
| --- | --- | --- | --- | --- | --- | --- |
| Dementia is a normal part of ageing. (1) |  |  |  |  |  |  |
| Dementia is curable. (2) |  |  |  |  |  |  |
| Dementia is preventable and able to be avoided. (3) |  |  |  |  |  |  |
| It is possible to reduce the risk of developing dementia. (4) |  |  |  |  |  |  |
| It is possible to delay the onset of dementia. (5) |  |  |  |  |  |  |

Q87 A risk factor is something that increases a person’s chance of developing a disease or condition. There are two types of risk factors: non-modifiable and modifiable. People have no control over non-modifiable risk factors, and they generally relate to genetics and age. People have control over modifiable risk factors. For example, sun exposure is a modifiable risk factor for developing skin cancer and smoking is a modifiable risk factor for developing lung cancer. Do you think there are any modifiable risk factors for dementia?

- Yes - please specify: (1) __________________________________________________
- No (2)

End of Block: Understanding of dementia

Start of Block: Caring related questions

Q65 Approximately how many years have you been caring for the person living with dementia? (please consider the total number of years even when a formal diagnosis was not present)

________________________________________________________________

________________________________________________________________

________________________________________________________________

________________________________________________________________

________________________________________________________________

Q66 What is your relationship to the person living with dementia? Please complete the statement, I am their:

- Child (1)
- Spouse (2)
- Parent (9)
- Co-habitating partner (3)
- Sibling (11)
- Son or daughter in-law (4)
- Nephew or niece (5)
- Grandparent (10)
- Friend (6)
- Neighbour (7)
- Other (please specify): (8) __________________________________________________

Q67 Approximately, how many hours per week do you care for the person with dementia?

________________________________________________________________

________________________________________________________________

________________________________________________________________

________________________________________________________________

________________________________________________________________

Q68 Are there other people involved in the care of the person living with dementia?

- Yes (1)
- No (4)

Q98 Please specify the people involved in the care of the person living with dementia (select all that apply).

- Informal (e.g., family members or friends) involved in the care (2) __________________________________________________
- Formal (i.e., paid) people involved in the care (3) __________________________________________________

Q99 Are you the primary caregiver or do you share this responsibility?

- I am the primary caregiver (2)
- I share primary caregiving responsibilities equally (3)
- I provide secondary support to the primary caregiver (4)
- Other (please specify) (5) __________________________________________________

| Page Break |  |
| --- | --- |

Q69 The following questions are about your experience of caring for a person with dementia. Please indicate the extent to which you agree or disagree with the following statements.

|  | Never (1) | Rarely (2) | Sometimes (3) | Quite frequently (4) | Nearly always (5) |
| --- | --- | --- | --- | --- | --- |
| Do you feel that your social life has suffered because you are caring for the person living with dementia? (6) |  |  |  |  |  |
| Do you feel the person you care for is dependent on you? (1) |  |  |  |  |  |
| Are you are afraid of what the future holds for the person you care for? (2) |  |  |  |  |  |
| Do you feel that the person you care for currently affects your relationships with other family members, partners or friends in a negative way? (3) |  |  |  |  |  |
| Do you feel embarrassed over the behaviour of the person you care for? (4) |  |  |  |  |  |
| Do you feel that the person you care for asks for more help than he/she needs? (5) |  |  |  |  |  |

End of Block: Caring related questions

Start of Block: Additional questions (all carers)

Q125 The following questions are provided as an optional additional section. Completion of these questions is entirely voluntary. Please note that some of these questions may address sensitive or confronting topics. If you are short on time, prefer to skip this section, or feel uncomfortable with any of the content, you may finish the survey here without any impact on your submission or participation. However, if you are able to, completing these questions will provide more insight into the experiences of your particular cohort. Please indicate whether you would like to proceed:

- Yes, I would like to proceed (4)
- No, I would like to finish the survey here (5)

Q2.2 How confident do you feel performing these tasks for your loved one?

|  | Not confident (1) | Slightly confident (2) | Moderately confident (3) | Very confident (4) | Extremely confident (5) |
| --- | --- | --- | --- | --- | --- |
| Daily personal care (1) |  |  |  |  |  |
| Peparing meals (2) |  |  |  |  |  |
| Managing medications (3) |  |  |  |  |  |
| Handling finances (4) |  |  |  |  |  |
| Medical appointments (5) |  |  |  |  |  |
| Housekeeping (6) |  |  |  |  |  |
| Transportation (7) |  |  |  |  |  |
| Legal/administrative tasks (8) |  |  |  |  |  |
| Emotional support (9) |  |  |  |  |  |
| Mobility assistance (10) |  |  |  |  |  |
| Managing behavioural symptoms (11) |  |  |  |  |  |
| Providing social engagement (12) |  |  |  |  |  |

Q2.3 What is the most challenging caregiving task you perform, and why?

________________________________________________________________

________________________________________________________________

________________________________________________________________

________________________________________________________________

________________________________________________________________

Q3.1 How would you describe the level of support from other family members?

- Extremely supportive and understanding (1)
- Mostly supportive with occasional misunderstandings (2)
- Somewhat supportive but significant misunderstandings (3)
- Minimal support and frequent conflicts (4)
- No support and extensive conflicts (5)
- Not applicable (no other close family members) (6)

Q3.2 What are the main barriers for family members who could help but don't? (check all that apply)

- Geographic distance (1)
- Work/career commitments (2)
- Their own family responsibilities (3)
- Emotional difficulty dealing with the situation (4)
- Lack of understanding about dementia and care needs (5)
- Disagreements about care approaches (6)
- Historical family conflicts or dynamics (7)
- Not applicable - all family members contribute as able (8)
- Other (please specify) (9) __________________________________________________

Q3.3 How often do you experience conflict about caregiving decisions?

- Never (1)
- Rarely (2)
- Sometimes (3)
- Often (4)
- Very frequently (5)
- Not applicable (6)

Q3.4 What are the most common sources of disagreement regarding care? (check all that apply)

- Level of care needed (1)
- Financial decisions (2)
- Distribution of caregiving responsibilities (3)
- Medical treatment decisions (4)
- Whether/when to seek professional care (5)
- Different perceptions of the person's abilities/needs (6)
- Communication styles with the person living with dementia (7)
- None - we generally agree on care approaches (8)
- Not applicable (9)
- Other (please specify (10) __________________________________________________

Q3.5 How confident are you in communicating with the person living with dementia you provide care for?

- Not at all confident (1)
- Slightly confident (2)
- Moderately confident (3)
- Very confident (4)
- Extremely confident (5)

Q4.1 How has your caregiving role affected these aspects of your life?

|  | Very negative (1) | Somewhat negative (2) | No impact (3) | Somewhat positive (4) | Very positive (5) |
| --- | --- | --- | --- | --- | --- |
| Physical health (1) |  |  |  |  |  |
| Mental wellbeing (2) |  |  |  |  |  |
| Social relationships (3) |  |  |  |  |  |
| Romantic relationships (6) |  |  |  |  |  |
| Education (7) |  |  |  |  |  |
| Career (8) |  |  |  |  |  |
| Financial situation (9) |  |  |  |  |  |
| Living arrangements (10) |  |  |  |  |  |
| Future plans (11) |  |  |  |  |  |
| Self-care time (12) |  |  |  |  |  |
| Personal identity (13) |  |  |  |  |  |

Q4.2 How often do you experience these feelings related to caregiving?

|  | Never (1) | Rarely (2) | Sometimes (3) | Often (4) | Always (5) |
| --- | --- | --- | --- | --- | --- |
| Stress (1) |  |  |  |  |  |
| Anxiety (2) |  |  |  |  |  |
| Sadness (3) |  |  |  |  |  |
| Frustration (6) |  |  |  |  |  |
| Guilt (7) |  |  |  |  |  |
| Isolation (8) |  |  |  |  |  |
| Pride in caregiving (9) |  |  |  |  |  |
| Satisfaction (10) |  |  |  |  |  |
| Connection with recipient (11) |  |  |  |  |  |
| Grief over changes (12) |  |  |  |  |  |

Q4.4 What aspects of your life are most difficult to manage while caregiving?

________________________________________________________________

________________________________________________________________

________________________________________________________________

________________________________________________________________

________________________________________________________________

Q5.1 How knowledgable do you feel about these financial/legal aspects?

|  | Not at all (6) | Slightly (7) | Moderately (8) | Very (4) | Extremely (5) |
| --- | --- | --- | --- | --- | --- |
| Enduring Power of Attorney (14) |  |  |  |  |  |
| Aged care funding (15) |  |  |  |  |  |
| Government entitlements (16) |  |  |  |  |  |
| Financial planning (4) |  |  |  |  |  |
| Estate planning/wills (5) |  |  |  |  |  |
| Guardianship processes (6) |  |  |  |  |  |

Q5.2 Have you experienced financial hardship from caregiving?

- Yes, severe financial hardship (14)
- Yes, moderate financial difficulties (15)
- Yes, slight financial impact (16)
- No financial impact (4)
- My financial situation has improved (5)

Q6.1 Please rate your experience with healthcare professionals.

|  | Very negative (6) | Somewhat negative (7) | Neutral (8) | Somewhat positive (4) | Very positive (5) |
| --- | --- | --- | --- | --- | --- |
| Recognition of your role (14) |  |  |  |  |  |
| Inclusion in planning (15) |  |  |  |  |  |
| Providing information (16) |  |  |  |  |  |
| Directing to support (4) |  |  |  |  |  |
| Addressing concerns (5) |  |  |  |  |  |
| Respect for your knowledge (6) |  |  |  |  |  |

Q6.2 Which healthcare tasks do you find most challenging? (check all that apply)

- Finding specialists (14)
- Getting referrals (15)
- Understanding treatment options (16)
- Coordinating between providers (4)
- Managing medications (5)
- Understanding dementia progression (7)
- Hospital visits/admissions (8)
- Transitioning to higher care (9)
- End-of-life planning (10)
- Other (please specify) (11) __________________________________________________

Q7.1 How often can you take time for yourself away from caregiving?

- Daily (14)
- Several times a week (13)
- Weekly (15)
- Monthly (16)
- Less than monthly (17)
- Almost never (18)

Q7.2 Have you accessed respite care services?

- Yes, regularly (14)
- Yes, occasionally (13)
- No, but I'm aware of services (15)
- No, I don't know what is available (16)
- No, available services aren't suitable (17)
- No, the person I support refuses respite care (18)

Q7.3 What barriers have you experienced in taking time for yourself? (check all that apply)

- Guilt about leaving the person I support (14)
- No one else is available to provide care (13)
- I can't afford paid care (15)
- Lack of suitable respite options (16)
- Concern about the quality of alternative care (17)
- The person refuses care from others (18)
- I feel I should always be available (19)
- Other (please specify) (20) __________________________________________________

Q7.4 How sustainable is your current caregiving situation?

- Very sustainable (14)
- Moderately sustainable (13)
- Slightly sustainable (15)
- Not sustainable (16)
- I'm already at breaking point (17)

Q8.2 How has your caregiving role influenced your own health behaviours? (check all that apply)

- I'm more conscious about my brain health (14)
- I've improved my diet (13)
- I exercise more regularly (15)
- I've reduced alcohol consumption (16)
- I've quit or reduced smoking (21)
- I prioritise mental health care (17)
- I get regular check-ups (22)
- I'm more knowledgeable about dementia risk factors (23)
- No change in health behaviours (24)
- My health behaviours have worsened due to caregiving demands (25)
- Other (please specify) (26) __________________________________________________

Q8.3 How concerned are you about developing dementia yourself?

- Not at all concerned (14)
- Slightly concerned (13)
- Moderately concerned (15)
- Very concerned (16)
- Extremely concerned (21)

Q9.1 Have you connected with other young adults supporting someone living with dementia?

- Yes, regularly (14)
- Yes, occasionally (13)
- No, but I would like to (15)
- No, I'm not interested in this (16)

Q9.2 What type of peer connection would you find most valuable? (check all that apply)

- In-person support groups (14)
- Online support groups (13)
- One-on-one mentoring from an experienced young carer (15)
- Social events with other young carers (16)
- Practical skill-sharing workshops (27)
- Moderated online forum or community (28)
- Other (please specify) (29) __________________________________________________
- I'm not interested in peer connection (30)

Q10.1 Which support services have you accessed? (check all that apply)

- Government-funded dementia organisations (Dementia Australia, Dementia Support Australia, etc.) (14)
- Support groups for young adults (Young Carers Network Australia, etc.) (13)
- Online forums or communities (Facebook, Instagram, LinkedIn etc.) (15)
- Respite care (16)
- Individual counselling/therapy (27)
- Financial assistance programs (28)
- Educational resources about dementia (29)
- Caregiver training programs (30)
- Home care services (31)
- Case management (32)
- None of the above (33)
- Other (please specify) (34) __________________________________________________

Q10.2 What barriers have you experienced in accessing support? (check all that apply)

- Lack of awareness of available services (14)
- Cost of services (13)
- Lack of time to access services (15)
- Services not relevant to young adults (16)
- Geographic distance/transportation issues (27)
- Waiting lists (28)
- Cultural or language barriers (29)
- Stigma or embarrassment (30)
- Not identifying with the term "carer" (31)
- Feeling that family care is expected or obligatory (32)
- Resistance from the person living with dementia (33)
- Difficulty finding replacement care (34)
- Other (please specify) (35) __________________________________________________
- No barriers experienced (36)

| 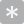 |
| --- |

Q10.3 What additional support would be most helpful to you in your supporting role? (Select the top 3)

- Financial support (14)
- Flexible work arrangements (13)
- More accessible respite care (15)
- Mental health support (16)
- Peer connection with other young carers (27)
- Better information about dementia progression (28)
- Training in caregiving skills (29)
- Legal/financial guidance (30)
- Help navigating healthcare systems (31)
- Technology to assist with care (32)
- Other (please specify) (33)

End of Block: Additional questions (all carers)

Start of Block: Available for interview

Q70 We are hoping to interview some study participants for an in-depth chat on some of the topics related to this survey. Please indicate whether you would like to be contacted for an interview during late 2025.

- Yes - I would like to participate in a follow-up interview in 2025 and agree to be contacted (1)
- No (2)

Q71 Please indicate whether you would like to be included on a registry to be contacted about future studies in this area.

- Yes - register my contact details for future studies (4)
- No (2)

Q88 Please provide your preferred contact method

- Mobile number (1) __________________________________________________
- Email address (2) __________________________________________________
- Home phone (3) __________________________________________________

Q102 Did you hear about our survey from StepUp for Research?

- Yes (1)
- No (2)

End of Block: Available for interview

Start of Block: End of survey notification

Q126 Once you click the next button, your answers will be submitted and recorded. Please ensure you have answered all questions correctly.

| Page Break |  |
| --- | --- |

End of Block: End of survey notification

**Supplementary Text 2. Online survey administered to non-caregivers**

Non-carers survey - Official

Start of Block: Introduction

Thank you for taking the time to participate in this survey.  We know your time is valuable, and we really appreciate you choosing to share your experiences with us. This survey is part of a national project aimed at better understanding the lives of people who support, help out, or care for a loved one living with dementia. The data that we collect will be separated from your name and contact details. We’ll only share group-level (aggregated) results in publications or reports. Thanks again for taking part.

End of Block: Introduction

Start of Block: Participant information sheet

Q96 Participant information non carers

Q98 • I have read the information statement version listed above and I understand its contents. • I believe I understand the purpose, extent and possible risks of my involvement in this project. • I voluntarily consent to take part in this research project. • I understand I do not have to answer questions and can withdraw at any time. • I have had an opportunity to ask questions (Amber.izett@student.curtin.edu.au; Claire.burley@curtin.edu.au), and I am satisfied with the answers I have received. • I understand that this project has been approved by Curtin University Human Research Ethics Committee (HRE2025-0207) and will be carried out in line with the National Statement on Ethical Conduct in Human Research (2007). • I understand I can download a copy of this Participant Information Sheet and keep for my records. Please sign below to indicate you agree to the above outlined points:

End of Block: Participant information sheet

Start of Block: Socio-demographic questions

Q1a Your first and last name: Please note, you will be allocated an ID number and your responses will not be linked to your name.

________________________________________________________________

| 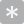 |
| --- |

Q2 Your age in years:

________________________________________________________________

Q3a Which of the following best describes your current gender identity?

- Woman or female (1)
- Man or male (2)
- Non-binary (3)
- I use a different term (please specify) (4) __________________________________________________
- Prefer not to say (5)

Q3b At birth, you were recorded as: (optional)

- Female (1)
- Male (2)
- Another term (please specify) (3) __________________________________________________
- Prefer not to say (4)

Q4 Do you identify as Aboriginal and/or Torres Strait Islander?

- Yes (1)
- No (2)
- Prefer not to say (3)

Q5a Which country/region were you born in?

- Oceania and Antarctica (1)
- North-West Europe (2)
- Southern and Eastern Europe (3)
- North Africa and the Middle East (4)
- South-East Asia (5)
- North-East Asia (6)
- Southern and Central Asia (7)
- Americas (8)
- Sub-Saharan Africa (9)
- Not sure/do not know (10)
- Another region/country not listed, please specify: (11) __________________________________________________
- Prefer not to say (12)

Q5b What is your cultural background? (Tick all that apply)

- Oceanian (1)
- North-West European (2)
- Southern and Eastern European (3)
- North African and Middle Eastern (4)
- South-East Asian (5)
- North-East Asian (6)
- Southern and Central Asian (7)
- People of the Americas (8)
- Sub-Saharan African (9)
- Not sure/do not know (10)
- Another cultural background not listed, please specify: (11) __________________________________________________
- Prefer not to say (12)

Q5c Do you use a language other than English?

- Yes. Please state other language/s: (1) __________________________________________________
- No (2)

Q6 What is the highest level of education you have completed?

- No education (1)
- Primary education (2)
- Secondary education (Years 9 and below) (3)
- Certificate I & II Level (4)
- Secondary education (Years 10 and above) (5)
- Certificate III & IV Level (6)
- Advanced Diploma & Diploma Level (7)
- Bachelor Degree Level (8)
- Graduate Diploma & Graduate Certificate Level (9)
- Postgraduate Degree Level (MA, MSc etc.) (10)
- Postgraduate Doctorate Level (PhD, MD) (11)
- Other (e.g., overseas qualification/s), please specify: (12) __________________________________________________

Q7 What is your marital status?

- Married (1)
- De Facto (2)
- Widowed (3)
- Divorced (4)
- Separated (5)
- Civil partnership (6)
- Co-habiting (7)
- Single (8)
- Other, please specify: (9) __________________________________________________
- Prefer not to say (10)

Q8 What is your current employment status?

- Employed (full-time) (1)
- Employed (part-time) (2)
- Self-employed (3)
- Retired (4)
- Student (7)
- Unemployed (5)
- Prefer not to say (6)

Q10 Do you have a diagnosis of any of the following physical health conditions? Please check those that apply:

- High blood pressure (1)
- Stroke (2)
- Heart disease (3)
- Heart attack (24)
- Angina (25)
- Atrial fibrillation (26)
- Type 1 diabetes (4)
- Type 2 diabetes (27)
- Mild Cognitive Impairment (MCI) (5)
- Parkinson's Disease (6)
- High cholesterol (7)
- Hypothyroidism (8)
- Hyperthyroidism (9)
- Arthritis (10)
- Huntington's Disease (11)
- Cancer (current) (12)
- Cancer (in full remission - no evidence of disease) (13)
- Osteoporosis (14)
- Asthma (15)
- Epilepsy (16)
- Motor Neurone Disease (17)
- Multiple Sclerosis (18)
- Paget's Disease (19)
- Deep Vein Thrombosis (20)
- Human Immunodeficiency Virus (HIV) (21)
- Acquired Immunodeficiency Virus (AIDS) (22)
- Hepatitis C Virus (chronic phase infection) (23)
- None of the above (28)
- Do not know (29)
- Prefer not to say (30)

| Page Break |  |
| --- | --- |

Q11 In the past 7 days, how would you rate your pain on average?

|  | 0 (1) | 1 (2) | 2 (3) | 3 (4) | 4 (5) | 5 (6) | 6 (7) | 7 (8) | 8 (9) | 9 (10) | 10 (11) |
| --- | --- | --- | --- | --- | --- | --- | --- | --- | --- | --- | --- |
| 0 = No pain; 10 = Worst pain imaginable (1) |  |  |  |  |  |  |  |  |  |  |  |

Q12 Do you have a diagnosis of any of the following mental health conditions? Please select those that apply:

- Depression (1)
- Mania, Hypomania, Bipolar, or Manic-depression (2)
- Anxiety, nerves, or generalised anxiety disorder (3)
- Social anxiety or social phobia (4)
- Agoraphobia (5)
- Panic attacks (6)
- Obsessive Compulsive Disorder (OCD) (7)
- Anorexia Nervosa (8)
- Bulimia Nervosa (9)
- Psychological over-eating or binge-eating (10)
- Schizophrenia (11)
- Any other type of psychosis or psychotic illness (12)
- A personality disorder (13)
- Autism, Aspergers or autistic spectrum disorder (14)
- Attention Deficit Disorder (ADD) or Attention Deficit and Hyperactivity Disorder (ADHD) (15)
- None of the above (16)
- Do not know (17)
- Prefer not to say (18)

Q82 Please indicate the extent to which you believe the following statements are true to you.

|  | Not at all (1) | Several days (2) | More than half the days (3) | Nearly every day (4) |
| --- | --- | --- | --- | --- |
| Over the last 2 weeks, how often have you been bothered by feeling nervous, anxious or on edge? (2) |  |  |  |  |
| Over the last 2 weeks, how often have you been bothered by not being able to stop or control worrying? (3) |  |  |  |  |
| Over the last 2 weeks, how often have you been bothered by little interest or pleasure in doing things? (4) |  |  |  |  |
| Over the last 2 weeks, how often have you felt down, depressed, or hopeless? (7) |  |  |  |  |

Q14.1 In the last month, how many times have you done any physical activity lasting at least 20 minutes that has left you out of breath?

- 0 times (1)
- 1 - 3 times (2)
- 4 - 10 times (3)
- 11 - 20 times (4)
- More than 20 times (5)

Q14.2 How much do you move and exert yourself physically during your leisure time (in the past year)? If your activity varies greatly between, for example, summer and winter, try to estimate on average.

- Physically inactive: Almost completely inactive, reading, watching television, watching movies, using computers or doing other sedentary activities, during leisure time. (1)
- Some light physical activity: Physically active for at least 4 hours/week, such as riding a bicycle or walking to work, walking with the family, gardening, fishing, table tennis, bowling etc. (2)
- Regular physical activity and training: Spending time doing heavy gardening, running, swimming, playing tennis, badminton, calisthenics and similar activities, for at least 2-3 hours/week. (3)
- Regular hard physical training for competitive sports: Spending time running, orienteering, skiing, swimming, playing football, handball etc. several times per week. (4)

End of Block: Socio-demographic questions

Start of Block: Views on ageing questions

This section contains statements on how a person may feel about getting older. Please indicate the extent to which you agree or disagree with the following statements.

Q15 With my increasing age, I realise that I pay more attention to my health.

- Not at all (1)
- A little (2)
- Moderately (3)
- Quite a bit (4)
- Very much (5)

Q16 With my increasing age, I realise that I have more experience and knowledge to evaluate things and people.

- Not at all (1)
- A little (2)
- Moderately (3)
- Quite a bit (4)
- Very much (5)

Q17 With my increasing age, I realise that I appreciate relationships and people much more.

- Not at all (1)
- A little (2)
- Moderately (3)
- Quite a bit (4)
- Very much (5)

Q18 With my increasing age, I realise that I have a better sense of what is important for me.

- Not at all (1)
- A little (2)
- Moderately (3)
- Quite a bit (4)
- Very much (5)

Q19 With my increasing age, I realise that I have more freedom to live my days the way I want.

- Not at all (1)
- A little (2)
- Moderately (3)
- Quite a bit (4)
- Very much (5)

Q20 With my increasing age, I realise that I have less energy.

- Not at all (1)
- A little (2)
- Moderately (3)
- Quite a bit (4)
- Very much (5)

Q21 With my increasing age, I realise that my mental capacity is declining.

- Not at all (1)
- A little (2)
- Moderately (3)
- Quite a bit (4)
- Very much (5)

Q22 With my increasing age, I realise that I feel more dependent on the help of others.

- Not at all (1)
- A little (2)
- Moderately (3)
- Quite a bit (4)
- Very much (5)

Q23 With my increasing age, I realise that I find it harder to motivate myself.

- Not at all (1)
- A little (2)
- Moderately (3)
- Quite a bit (4)
- Very much (5)

Q24 With my increasing age, I realise that I have to limit my activities.

- Not at all (1)
- A little (2)
- Moderately (3)
- Quite a bit (4)
- Very much (5)

| 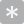 |
| --- |

Q25 Many people feel younger or older than they actually are. Fill in the age (in years) that you feel most of the time.

________________________________________________________________

| 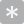 |
| --- |

Q26 If you could be any age that you wanted to be, what age would you choose (in years)?

________________________________________________________________

| 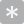 |
| --- |

Q27 What age do you think you will live to?

________________________________________________________________

Q28 What do you think: Is the way we are aging immutable and predetermined by genetics or more malleable and changeable?

|  | 0 | 10 | 20 | 30 | 40 | 50 | 60 | 70 | 80 | 90 | 100 |
| --- | --- | --- | --- | --- | --- | --- | --- | --- | --- | --- | --- |

| 0 = Immutable and predetermined by genetics; 100 = Malleable and changeable () | 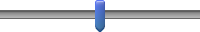 |
| --- | --- |

| 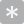 |
| --- |

Q29 At what age would you describe someone as being "old" (in years)?

________________________________________________________________

End of Block: Views on ageing questions

Start of Block: Expectations of ageing

Q30 The following questions regard your expectations about ageing. Please indicate the extent to which you agree or disagree with the following statements.

|  | Definitely agree (1) | Somewhat agree (2) | Somewhat disagree (4) | Definitely disagree (5) |
| --- | --- | --- | --- | --- |
| When people get older, they need to lower their expectations of how healthy they can be. (6) |  |  |  |  |
| Having more aches and pains is an accepted part of ageing. (7) |  |  |  |  |
| The human body is like a car: When it gets old, it gets worn out. (8) |  |  |  |  |
| Every year that people age, their energy levels go down a little more. (4) |  |  |  |  |
| I expect that as I get older I will spend less time with friends and family. (5) |  |  |  |  |
| Being lonely is just something that happens when people get old. (9) |  |  |  |  |
| As people get older they worry more. (10) |  |  |  |  |
| It’s normal to be depressed when you are old. (11) |  |  |  |  |
| I expect that as I get older I will become more forgetful. (12) |  |  |  |  |
| It’s an accepted part of ageing to have trouble remembering names. (13) |  |  |  |  |
| Forgetfulness is a natural occurrence just from growing old. (14) |  |  |  |  |
| It is impossible to avoid the mental slowness that happens with ageing. (15) |  |  |  |  |

End of Block: Expectations of ageing

Start of Block: Preparation for future care needs

Q42 The following statements explore your preparation for future care needs. Please indicate the extent to which you believe the following statements are true to you.

|  | Not at all true of me (1) | Not really true of me (2) | Neither true nor untrue (3) | Somewhat true of me (4) | Completely true of me (5) |
| --- | --- | --- | --- | --- | --- |
| I have thought about whether I might need help or care in the future. (1) |  |  |  |  |  |
| I try not to think about things like future loss of independence. (2) |  |  |  |  |  |
| I have gathered information about options for care by talking to friends and/or relatives. (3) |  |  |  |  |  |
| If I ever need help or care, I can choose between several options that I have considered in some depth. (4) |  |  |  |  |  |
| I have explained to someone close to me what my care preferences are (e.g., involvement in decision-making processes, receiving information regarding your illness, views on end of life care). (5) |  |  |  |  |  |

Q89 Advanced care planning involves planning for your and/or your loved ones' future health care. It enables you to make decisions about the health care you would or would not like to receive if you were to become seriously ill and unable to communicate your preferences or make treatment decisions. Have you discussed advanced care planning with your GP or another healthcare professional?

- Yes (1)
- No (2)
- Unsure (3)
- Prefer not to say (4)

End of Block: Preparation for future care needs

Start of Block: Understanding of dementia

Q59 Please define in your own words, your understanding of dementia:

________________________________________________________________

________________________________________________________________

________________________________________________________________

________________________________________________________________

________________________________________________________________

Q60 Please indicate the extent to which you agree or disagree with the following statements:

|  | Strongly disagree (1) | Disagree (2) | Somewhat disagree (3) | Somewhat agree (4) | Agree (5) | Strongly agree (6) |
| --- | --- | --- | --- | --- | --- | --- |
| Dementia is a normal part of ageing. (1) |  |  |  |  |  |  |
| Dementia is curable. (2) |  |  |  |  |  |  |
| Dementia is preventable and able to be avoided. (3) |  |  |  |  |  |  |
| It is possible to reduce the risk of developing dementia. (4) |  |  |  |  |  |  |
| It is possible to delay the onset of dementia. (5) |  |  |  |  |  |  |

Q87 A risk factor is something that increases a person’s chance of developing a disease or condition. There are two types of risk factors: non-modifiable and modifiable. People have no control over non-modifiable risk factors, and they generally relate to genetics and age. People have control over modifiable risk factors. For example, sun exposure is a modifiable risk factor for developing skin cancer and smoking is a modifiable risk factor for developing lung cancer. Do you think there are any modifiable risk factors for dementia?

- Yes - please specify: (1) __________________________________________________
- No (2)

End of Block: Understanding of dementia

Start of Block: Available for interview

Q70 We are hoping to interview some study participants for an in-depth chat on some of the topics related to this survey. Please indicate whether you would like to be contacted for an interview during late 2025.

- Yes - I would like to participate in a follow-up interview in 2025 and agree to be contacted (1)
- No (2)

Q71 Please indicate whether you would like to be included on a registry to be contacted about future studies in this area.

- Yes - register my contact details for future studies (4)
- No (2)

Q88 Please provide your preferred contact method

- Mobile number (1) __________________________________________________
- Email address (2) __________________________________________________
- Home phone (3) __________________________________________________

Q49 Did you hear about our survey from StepUp for Research?

- Yes (1)
- No (2)

End of Block: Available for interview

Start of Block: End of survey notification

Q94 Once you click the next button, your answers will be submitted and recorded. Please ensure you have answered all questions correctly.

| Page Break |  |
| --- | --- |
